# Supplementary material for: The Structural Effects of Phosphorylation of Protein Arginine Methyltransferase 5 on Its Binding to Histone H4
Source: MDPI journal article supplement (doi:10.3390/ijms231911316), 2022-09-26
Supplement: s1 [file s1]

# Supplementary Information

## The structural effects of phosphorylation of protein arginine methyltransferase 5 on its binding to histone H4

Rita Börzsei<sup>1,2</sup>, Bayartsetseg Bayarsaikhan<sup>1</sup>, Balázs Zoltán Zsidó<sup>1,2</sup>, Beáta Lontay<sup>3</sup>, Csaba Hetényi<sup>1,2\*</sup>

<sup>1</sup>Department of Pharmacology and Pharmacotherapy, Medical School, University of Pécs, Hungary.

<sup>2</sup>János Szentágothai Research Centre & Centre for Neuroscience, University of Pécs, Hungary.

<sup>3</sup>Department of Medical Chemistry, Faculty of Medicine, University of Debrecen, 4032 Debrecen, Hungary.

### Table of Contents

|                                                                                                                                                                    |    |
|--------------------------------------------------------------------------------------------------------------------------------------------------------------------|----|
| <b>Table S1</b> Human and non-human PRMT5 complexes collected from PDB Database.....                                                                               | 2  |
| <b>Table S2</b> Lenard-Jones and Coulumb type interaction energy of the unmodified and phosphorylated H4-PRMT5-MEP50 complexes in P1 and P2 conformation. ....     | 6  |
| <b>Table S3</b> Interacting H4 residues within 3.5 Å distance from DNA in the structure of nucleosome core particle.....                                           | 7  |
| <b>Figure S1</b> RMSD plots of histone H4, PRMT5 and MEP50 during MD simulations.....                                                                              | 8  |
| <b>Figure S2</b> RMSD of Helix 3 of histone H4 and its conformations with maximum and minimum RMSD value.....                                                      | 9  |
| <b>Figure S3</b> Changing of the distance between the hydroxyl O atoms of R40, R45 (histone H4) and phosphate P atom of pT80 (PRMT5) during the MD simulation..... | 10 |
| <b>Figure S4</b> The representative structure of the unmodified H4-PRMT5-MEP50 complex in the pre-product state.....                                               | 10 |
| <b>Figure S5</b> Representative structure of histone H4 protein in complex with PRMT5 <sub>P</sub> in the pre-product state.....                                   | 11 |
| <b>References</b> .....                                                                                                                                            | 12 |

**Table S1** Human and non-human PRMT5 complexes collected from PDB Database.

| PDB code              | Release date | Title                                                                                        | Target       | Ligand                     | Method            | Resolution | Reference                      |
|-----------------------|--------------|----------------------------------------------------------------------------------------------|--------------|----------------------------|-------------------|------------|--------------------------------|
| Human PRMT5 complexes |              |                                                                                              |              |                            |                   |            |                                |
| 7U30                  | 2022         | PRMT5:MEP50 complexed with cyclonucleoside Compound 1                                        | PRMT5: MEP50 | LB3 707 - PRMT5 inhibitor  | X-ray diffraction | 2.6        | [1]                            |
| 7s1p                  | 2022         | PRMT5/MEP50 crystal structure with sinefungin bound                                          | PRMT5: MEP50 | MRTx1719 - PRMT5 inhibitor | X-ray diffraction | 2.21       | [2]                            |
| 7bo7                  | 2022         | Crystal structure of the human PRMT5:MEP50 complex with JNJB44355437                         | PRMT5: MEP50 | PRMT5 inhibitor            | X-ray diffraction | 2.83       | Brown et al. (To be published) |
| 7ses                  | 2022         | PRMT5/MEP50 with compound 29 bound                                                           | PRMT5: MEP50 | PRMT5 inhibitor            | X-ray diffraction | 2.5        | [2]                            |
| 7ser                  | 2022         | PRMT5/MEP50 with compound 30 bound                                                           | PRMT5: MEP50 | PRMT5 inhibitor            | X-ray diffraction | 2.14       | [2]                            |
| 7s1s                  | 2022         | PRMT5/MEP50 crystal structure with MTA and MRTX-1719 bound                                   | PRMT5: MEP50 | PRMT5 inhibitor            | X-ray diffraction | 2.62       | [2]                            |
| 7s1r                  | 2022         | PRMT5/MEP50 crystal structure with MTA and a phthalazinone inhibitor bound (compound (M)-31) | PRMT5: MEP50 | PRMT5 inhibitor            | X-ray diffraction | 2.10       | [2]                            |
| 7s1Q                  | 2022         | PRMT5/MEP50 crystal structure with MTA and a phthalazinone inhibitor bound (Compound 9)      | PRMT5: MEP50 | PRMT5 inhibitor            | X-ray diffraction | 2.78       | [2]                            |
| 7s0u                  | 2022         | PRMT5/MEP50 crystal structure with MTA and                                                   | PRMT5: MEP50 | PRMT5 inhibitor            | X-ray diffraction | 2.01       | [2]                            |

|      |      |                                                                             |                                    |                    |                      |       |     |
|------|------|-----------------------------------------------------------------------------|------------------------------------|--------------------|----------------------|-------|-----|
|      |      | phthalazinone<br>fragment bound                                             |                                    |                    |                      |       |     |
| 7mxn | 2021 | PRMT5(M420T<br>mutant):MEP50<br>complexed with<br>inhibitor PF-<br>06939999 | PRMT5<br>(M420T<br>mutant):<br>MEP | PRMT5<br>inhibitor | X-ray<br>diffraction | 2.55  | [3] |
| 7mxg | 2021 | PRMT5(M420T<br>mutant):MEP50<br>complexed with<br>inhibitor PF-<br>06855800 | PRMT5<br>(M420T<br>mutant):<br>MEP | PRMT5<br>inhibitor | X-ray<br>diffraction | 2.395 | [3] |
| 7mxc | 2021 | PRMT5:MEP50<br>complexed with<br>adenosine                                  | PRMT5:<br>MEP50                    | adenosine          | X-ray<br>diffraction | 2.41  | [3] |
| 7mxa | 2021 | PRMT5:MEP50<br>complexed with<br>inhibitor PF-<br>06855800                  | PRMT5:<br>MEP50                    | PRMT5<br>inhibitor | X-ray<br>diffraction | 2.713 | [3] |
| 7mx7 | 2021 | PRMT5:MEP50<br>complexed with<br>inhibitor PF-<br>06939999                  | PRMT5:<br>MEP50                    | PRMT5<br>inhibitor | X-ray<br>diffraction | 2.49  | [3] |
| 7kid | 2021 | PRMT5:MEP50<br>complexed with<br>5,5-bicyclic<br>inhibitor<br>Compound 72   | PRMT5:<br>MEP50                    | PRMT5<br>inhibitor | X-ray<br>diffraction | 2.5   | [4] |
| 7kic | 2021 | PRMT5:MEP50<br>complexed with<br>5,5-bicyclic<br>inhibitor<br>Compound 34   | PRMT5:<br>MEP50                    | PRMT5<br>inhibitor | X-ray<br>diffraction | 2.43  | [4] |
| 7kib | 2021 | PRMT5:MEP50<br>complexed with<br>5,5-bicyclic<br>inhibitor<br>Compound 4    | PRMT5:<br>MEP50                    | PRMT5<br>inhibitor | X-ray<br>diffraction | 2.52  | [4] |
| 7l1g | 2021 | PRMT5-MEP50<br>complexed with<br>SAM                                        | PRMT5:<br>MEP50                    | SAM                | X-ray<br>diffraction | 2.47  | [5] |
| 7m05 | 2021 | CryoEM structure<br>of PRMT5 bound<br>to covalent PBM-                      | PRMT5:<br>MEP50                    | PRMT5<br>inhibitor | Cryo-EM              | 2.39  | [6] |

|      |      |                                                                                                                     |                                  |                    |                      |      |                                      |
|------|------|---------------------------------------------------------------------------------------------------------------------|----------------------------------|--------------------|----------------------|------|--------------------------------------|
|      |      | site inhibitor<br>BRD-6988                                                                                          |                                  |                    |                      |      |                                      |
| 6ugh | 2020 | Cryo-EM<br>structure of the<br>apo form of<br>human<br>PRMT5:MEP50<br>complex at a<br>resolution of 3.4<br>angstrom | PRMT5:<br>MEP50                  |                    | Cryo-EM              | 3.4  | Zhou (to<br>be<br>published)         |
| 6v0p | 2020 | PRMT5 complex<br>bound to covalent<br>PBM inhibitor<br>BRD6711                                                      | PRMT5:<br>MEP50                  | PRMT5<br>inhibitor | X-ray<br>diffraction | 1.88 | [6]                                  |
| 6v0o | 2020 | PRMT5 bound to<br>the PBM peptide<br>from pICln                                                                     | PRMT5:<br>MEP50:<br>PBM          | sinefungin         | X-ray<br>diffraction | 2.86 | [7]                                  |
| 6v0n | 2020 | PRMT5 bound to<br>PBM peptide<br>from Riok1                                                                         | PRMT5:<br>MEP50:<br>Riok1<br>PBM | sinefungin         | X-ray<br>diffraction | 2.11 | [7]                                  |
| 6uxy | 2020 | PRMT5:MEP50<br>complexed with<br>allosteric inhibitor<br>Compound 8                                                 | PRMT5:<br>MEP50                  | PRMT5<br>inhibitor | X-ray<br>diffraction | 2.57 | [8]                                  |
| 6uxx | 2020 | PRMT5:MEP50<br>complexed with<br>allosteric inhibitor<br>Compound 1a                                                | PRMT5:<br>MEP50                  | PRMT5<br>inhibitor | X-ray<br>diffraction | 2.69 | [8]                                  |
| 6rlq | 2020 | Crystal structure<br>of the human<br>PRMT5:MEP50<br>complex with<br>JNJ45031882                                     | PRMT5:<br>MEP50                  | PRMT5<br>inhibitor | X-ray<br>diffraction | 2.53 | Brown et<br>al. (To be<br>published) |
| 6rll | 2020 | Crystal structure<br>of the human<br>PRMT5:MEP50<br>complex with<br>JNJ44064146                                     | PRMT5:<br>MEP50                  | PRMT5<br>inhibitor | X-ray<br>diffraction | 2.22 | Brown et<br>al. (To be<br>published) |
| 6k1s | 2019 | Discovery of<br>potent and<br>selective covalent<br>protein arginine<br>methyltransferase                           | PRMT5:<br>MEP50                  | PRMT5<br>inhibitor | X-ray<br>diffraction | 2.6  | [9]                                  |

|          |      |                                                                                                                      |              |                 |                   |       |                                  |
|----------|------|----------------------------------------------------------------------------------------------------------------------|--------------|-----------------|-------------------|-------|----------------------------------|
|          |      | (PRMT5)<br>inhibitors                                                                                                |              |                 |                   |       |                                  |
| 6ckc     | 2018 | Structure of PRMT5:MEP50 in complex with LLY-283, a potent and selective inhibitor of PRMT5, with antitumor activity | PRMT5: MEP50 | PRMT5 inhibitor | X-ray diffraction | 2.8   | [10]                             |
| 5c9z     | 2016 | Crystal structure of PRMT5:MEP50 with EPZ015866 and sinefungin                                                       | PRMT5: MEP50 | PRMT5 inhibitor | X-ray diffraction | 2.36  | Boriack-Sjodin (To be published) |
| 5fa5     | 2016 | Crystal structure of PRMT5:MEP50 in complex with MTA and H4 peptide                                                  | PRMT5: MEP50 | H4, MTA         | X-ray diffraction | 2.34  | [11]                             |
| 5em<br>m | 2016 | Crystal structure of PRMT5:MEP50 with Compound 15 and sinefungin                                                     | PRMT5: MEP50 | PRMT5 inhibitor | X-ray diffraction | 2.37  | [12]                             |
| 5eml     | 2016 | Crystal structure of PRMT5:MEP50 with Compound 10 and SAM                                                            | PRMT5: MEP50 | PRMT5 inhibitor | X-ray diffraction | 2.39  | [12]                             |
| 5emk     | 2016 | Crystal structure of PRMT5:MEP50 with Compound 9 and sinefungin                                                      | PRMT5: MEP50 | PRMT5 inhibitor | X-ray diffraction | 2.52  | [12]                             |
| 5emj     | 2016 | Crystal structure of PRMT5:MEP50 with Compound 8 and sinefungin                                                      | PRMT5: MEP50 | PRMT5 inhibitor | X-ray diffraction | 2.273 | [12]                             |
| 4x63     | 2015 | Crystal structure of PRMT5:MEP50 with EPZ015666 and SAH                                                              | PRMT5: MEP50 | PRMT5 inhibitor | X-ray diffraction | 3.05  | [13]                             |

|                          |      |                                                                                   |              |                 |                   |      |      |
|--------------------------|------|-----------------------------------------------------------------------------------|--------------|-----------------|-------------------|------|------|
| 4x61                     | 2015 | Crystal structure of PRMT5:MEP50 with EPZ015666 and SAM                           | PRMT5: MEP50 | PRMT5 inhibitor | X-ray diffraction | 2.85 | [13] |
| 4x60                     | 2015 | Crystal structure of PRMT5:MEP50 with EPZ015666 and sinefungin                    | PRMT5: MEP50 | PRMT5 inhibitor | X-ray diffraction | 2.35 | [13] |
| 4gqb                     | 2012 | Crystal structure of the human PRMT5:MEP50 Complex                                | PRMT5: MEP50 | H4              | X-ray diffraction | 2.06 | [14] |
| Non human PRMT complexes |      |                                                                                   |              |                 |                   |      |      |
| 4g56                     | 2012 | Crystal Structure of full length PRMT5/MEP50 complexes from <i>Xenopus laevis</i> | PRMT5: MEP50 |                 | X-ray diffraction | 2.95 | [15] |
| 3ua4                     | 2011 | Crystal Structure of Protein Arginine Methyltransferase PRMT5                     | PRMT5: MEP50 |                 | X-ray diffraction | 3.00 | [16] |
| 3ua3                     | 2011 | Crystal Structure of Protein Arginine Methyltransferase PRMT5 in complex with SAH | PRMT5: MEP50 | SAH             | X-ray diffraction | 3.00 | [16] |

**Table S2** Lenard-Jones (LJ) and Coulumb type (Cb) interaction energy of the unmodified and phosphorylated H4-PRMT5-MEP50 complexes in P1 and P2 conformation. P1 and P2 representative structures were selected by cluster analysis (grey background) and in the case of P2 also on the basis of  $E_{\text{inter}}$  (white), respectively. See also Methods for details. Both types of representatives of P2 complex structures show lower intermolecular interaction energy than the P1 structures.

| Complex        |    | LJ     | Cb     | $E_{\text{inter}}$ |
|----------------|----|--------|--------|--------------------|
| H4-PRMT5-MEP50 | P1 | -148.7 | -134.1 | <b>-282.8</b>      |
|                | P2 | -201.4 | -168.5 | <b>-369.9</b>      |
|                | P2 | -191.7 | -167.3 | <b>-359.0</b>      |

|                              |    |        |        |               |
|------------------------------|----|--------|--------|---------------|
| H4-PRMT5 <sub>p</sub> -MEP50 | P1 | -190.3 | -136.7 | <b>-327.0</b> |
|                              | P2 | -192.3 | -153.7 | <b>-346.0</b> |
|                              | P2 | -184.4 | -174.8 | <b>-359.2</b> |

**Table S3** Interacting H4 residues within 3.5 Å distance from DNA in the structure of nucleosome core particle (PDB code: 1kx5). Amino acids taking place in DNA binding in the case of both histone H4 peptides (chain ID B and F) and determined as DNA binding domain of histone H4 in nucleosome are highlighted with grey.

| Histone H4 residues | Residues taking place in DNA binding for |                  |
|---------------------|------------------------------------------|------------------|
|                     | Chain B                                  | Chain F          |
| S1                  |                                          | dG+25 I, dG+24 I |
| G2                  |                                          | dG+25 I          |
| R3                  |                                          | dG+25 I          |
| K5                  | dT-10 I, dT-9 I                          |                  |
| G6                  | dT-10 I                                  |                  |
| G9                  | dG+14 J                                  | dA+26 I, dG+27 I |
| K12                 |                                          | dG+25 I          |
| K16                 | dG+25 I, dC+15 J, dC+16 J                | dG+24 I, dG+25 I |
| R17                 | dC+15 J, dC+16 J                         | dT-22 J          |
| H18                 | dC+16 J                                  | dC-21 J          |
| R19                 | dC+16 J, dT+17 J                         | dT-22 J          |
| T30                 |                                          | dT-12 J          |
| P32                 | dA-13 I                                  | dA-13 J          |
| R35                 | dG+8 J                                   |                  |
| R36                 | dA-13 I                                  | dA-13 J          |
| R45                 | dT+7 J, dG+8 J, dG-3*                    | dT+7 I, dG+8 I   |
| I46                 | dT+7J, dG+8 J                            | dT+7 I, dG+8 I   |
| S47                 |                                          | dT+7 I           |
| G48                 | dT+7 J                                   | dT+7 I           |
| R78                 | dC+28 J                                  |                  |
| K79                 | dG+27 J, dC+28 J                         | dG+27 I, dC+28 I |
| T80                 | dC+28 J                                  | dC+28 I          |

\* distance is 4.8 Å

**Figure S1** RMSD for C $\alpha$  atoms of histone H4 (A) compared to the initial conformation of the peptide during the 1000 ns-long MD simulation. RMSD for C $\alpha$  atoms of PRMT5 (B) and MEP50 (C) after a least squares fitting to the MEP50 structure during the 580 ns-long MD simulation.

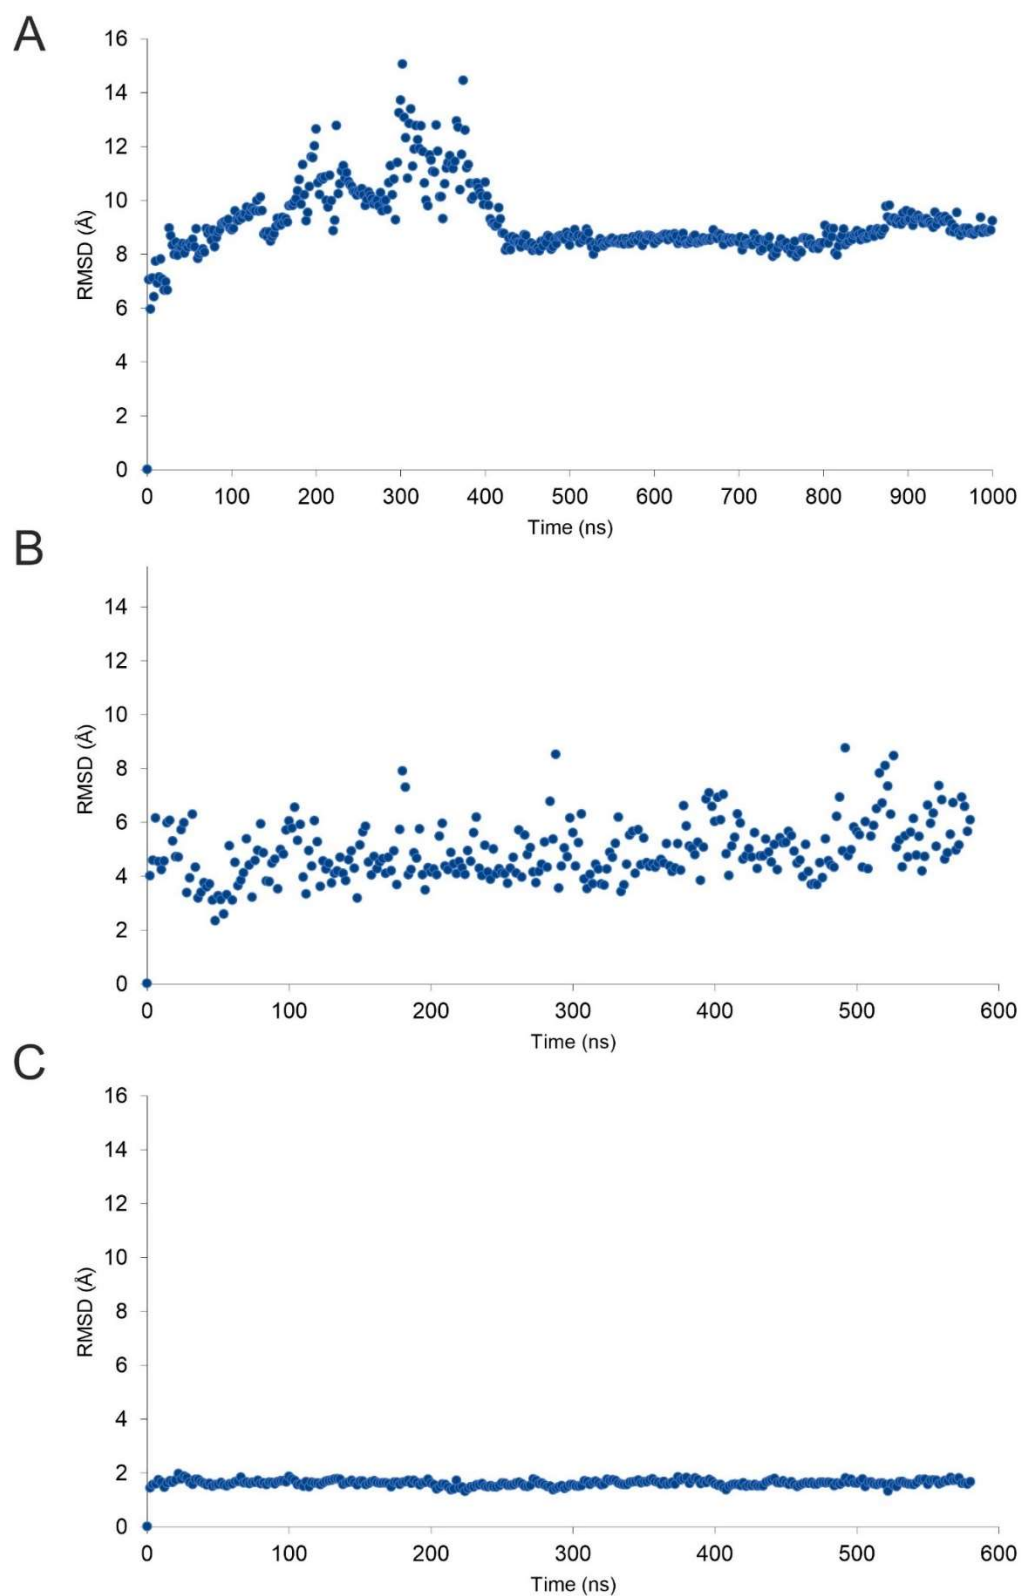



**Figure S2 (A)** C $\alpha$  RMSD of Helix 3 of histone H4. Time points with the minimum and the maximum RMSD value are highlighted with red. **(B)** Histone H4 structures (grey, cartoon) with the minimum and the maximum RMSD value. Position of the helix fracture at residue G56 is represented as spheres, all atom.

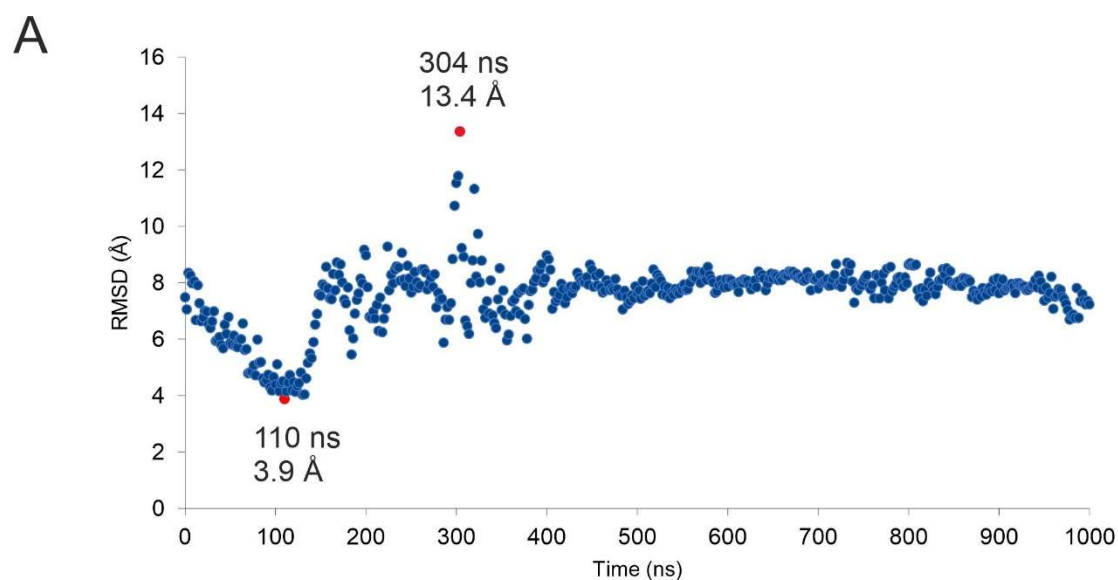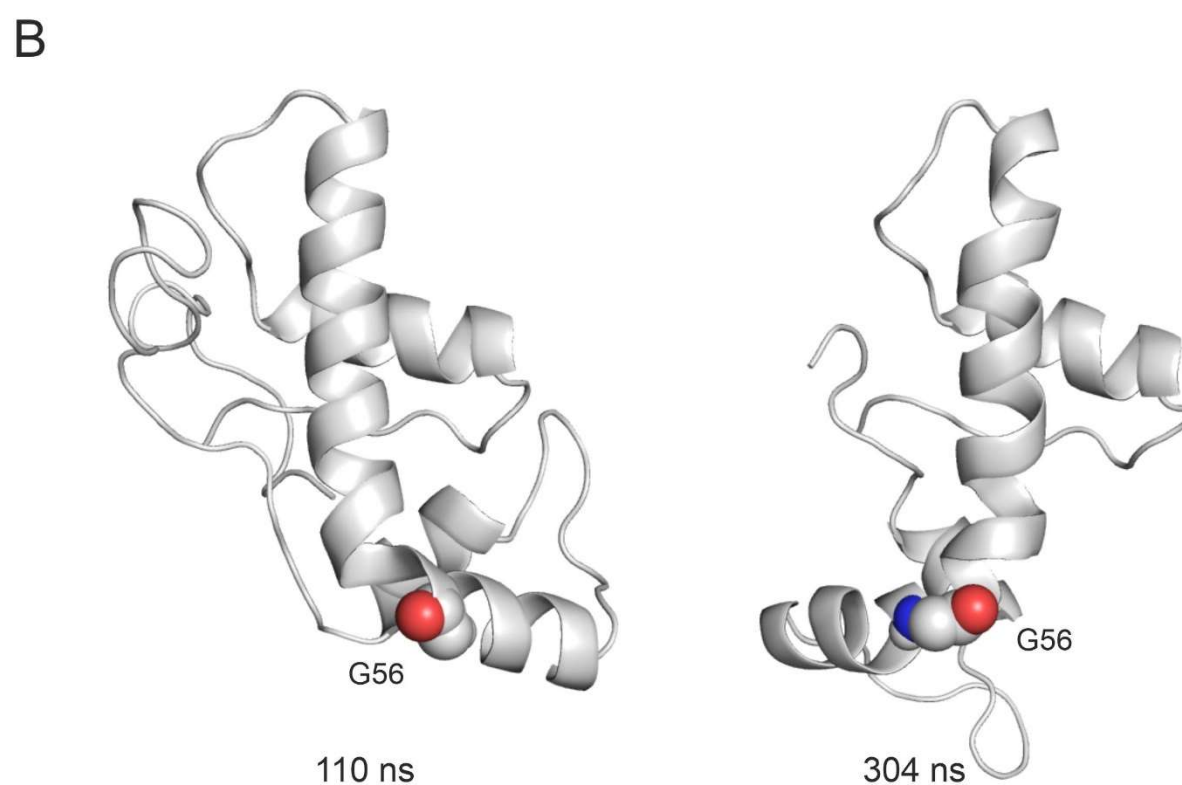

**Figure S3** Changing of the distance between the hydroxyl O atoms of R40, R45 (histone H4) and phosphate P atom of pT80 (PRMT5) ( $d_{O-P}$ ) during the MD simulation.

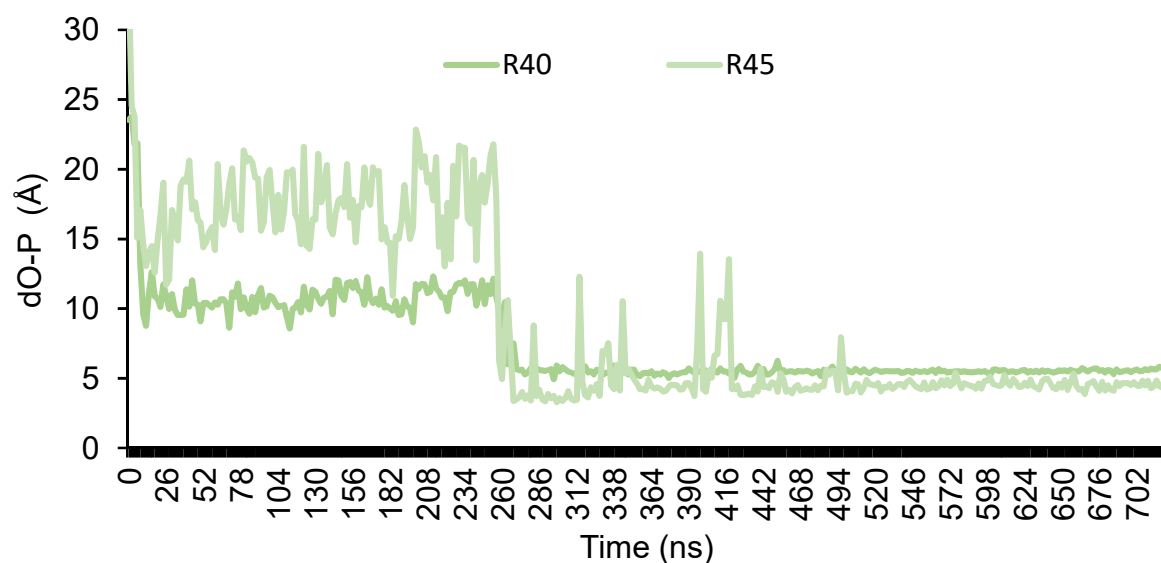

**Figure S4** The representative structure of the unmodified H4-PRMT5-MEP50 complex in the pre-product state (P2 in **Fig. 1B**). MEP50 (blue, cartoon) is in direct contact with PRMT5 (grey, cartoon) instead of histone H4 (teal, cartoon).

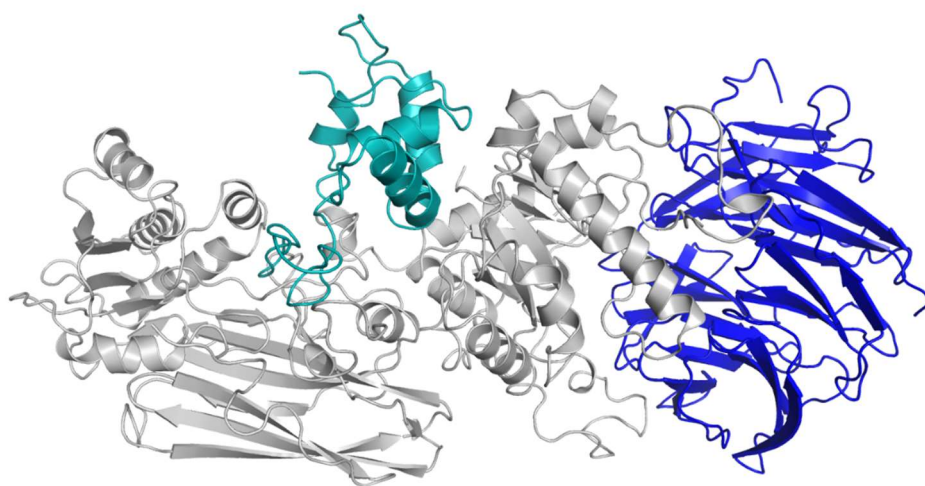

**Figure S5** Representative structure of histone H4 protein (grey and teal, cartoon) in complex with PRMT5<sub>P</sub> in the pre-product state. Helix 3 (teal) adopts a mostly linear conformation similar to the apo form of H4.

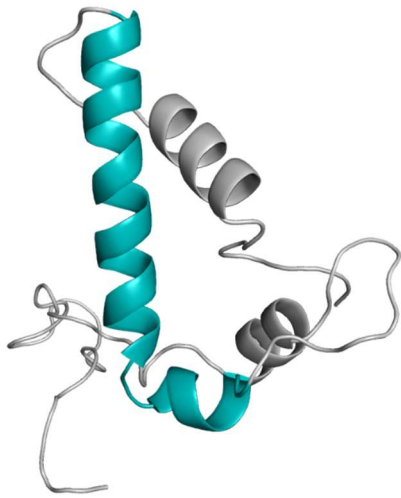

## References

1. Kawamura, S.; Palte, R.L.; Kim, H.-Y.; Saurí, J.; Sondey, C.; Mansueto, M.S.; Altman, M.D.; Machacek, M.R. Design and Synthesis of Unprecedented 9- and 10-Membered Cyclonucleosides with PRMT5 Inhibitory Activity. *Bioorg. Med. Chem.* **2022**, *66*, 116820, doi:10.1016/j.bmc.2022.116820.
2. Smith, C.R.; Aranda, R.; Bobinski, T.P.; Briere, D.M.; Burns, A.C.; Christensen, J.G.; Clarine, J.; Engstrom, L.D.; Gunn, R.J.; Ivetac, A.; et al. Fragment-Based Discovery of MRTX1719, a Synthetic Lethal Inhibitor of the PRMT5•MTA Complex for the Treatment of MTAP-Deleted Cancers. *J. Med. Chem.* **2022**, *65*, 1749–1766, doi:10.1021/acs.jmedchem.1c01900.
3. Jensen-Pergakes, K.; Tatlock, J.; Maegley, K.A.; McAlpine, I.J.; McTigue, M.; Xie, T.; Dillon, C.P.; Wang, Y.; Yamazaki, S.; Spiegel, N.; et al. SAM-Competitive PRMT5 Inhibitor PF-06939999 Demonstrates Antitumor Activity in Splicing Dysregulated NSCLC with Decreased Liability of Drug Resistance. *Mol. Cancer Ther.* **2022**, *21*, 3–15, doi:10.1158/1535-7163.MCT-21-0620.
4. Quiroz, R.V.; Reutershan, M.H.; Schneider, S.E.; Sloman, D.; Lacey, B.M.; Swalm, B.M.; Yeung, C.S.; Gibeau, C.; Spellman, D.S.; Rankic, D.A.; et al. The Discovery of Two Novel Classes of 5,5-Bicyclic Nucleoside-Derived PRMT5 Inhibitors for the Treatment of Cancer. *J. Med. Chem.* **2021**, *64*, 3911–3939, doi:10.1021/acs.jmedchem.0c02083.
5. Candito, D.A.; Ye, Y.; Quiroz, R.V.; Reutershan, M.H.; Witter, D.; Gadamsetty, S.B.; Li, H.; Saurí, J.; Schneider, S.E.; Lam, Y.; et al. Development of a Flexible and Robust Synthesis of Tetrahydrofuro[3,4-b]Furan Nucleoside Analogues. *J. Org. Chem.* **2021**, *86*, 5142–5151, doi:10.1021/acs.joc.0c02969.
6. McKinney, D.C.; McMillan, B.J.; Ranaghan, M.J.; Moroco, J.A.; Brousseau, M.; Mullin-Bernstein, Z.; O’Keefe, M.; McCarren, P.; Mesleh, M.F.; Mulvaney, K.M.; et al. Discovery of a First-in-Class Inhibitor of the PRMT5–Substrate Adaptor Interaction. *J. Med. Chem.* **2021**, *64*, 11148–11168, doi:10.1021/acs.jmedchem.1c00507.
7. Mulvaney, K.M.; Blomquist, C.; Acharya, N.; Li, R.; Ranaghan, M.J.; O’Keefe, M.; Rodriguez, D.J.; Young, M.J.; Kesar, D.; Pal, D.; et al. Molecular Basis for Substrate Recruitment to the PRMT5 Methylosome. *Mol. Cell* **2021**, *81*, 3481–3495.e7, doi:10.1016/j.molcel.2021.07.019.
8. Palte, R.L.; Schneider, S.E.; Altman, M.D.; Hayes, R.P.; Kawamura, S.; Lacey, B.M.; Mansueto, M.S.; Reutershan, M.; Siliphaivanh, P.; Sondey, C.; et al. Allosteric Modulation of Protein Arginine Methyltransferase 5 (PRMT5). *ACS Med. Chem. Lett.* **2020**, *11*, 1688–1693, doi:10.1021/acsmchemlett.9b00525.
9. Lin, H.; Wang, M.; Zhang, Y.W.; Tong, S.; Leal, R.A.; Shetty, R.; Vaddi, K.; Luengo, J.I. Discovery of Potent and Selective Covalent Protein Arginine Methyltransferase 5 (PRMT5) Inhibitors. *ACS Med. Chem. Lett.* **2019**, *10*, 1033–1038, doi:10.1021/acsmchemlett.9b00074.
10. Bonday, Z.Q.; Cortez, G.S.; Grogan, M.J.; Antonysamy, S.; Weichert, K.; Bocchinfuso, W.P.; Li, F.; Kennedy, S.; Li, B.; Mader, M.M.; et al. LLY-283, a Potent and Selective Inhibitor of Arginine Methyltransferase 5, PRMT5, with Antitumor Activity. *ACS Med. Chem. Lett.* **2018**, *9*, 612–617, doi:10.1021/acsmchemlett.8b00014.
11. Mavrakis, K.J.; McDonald, E.R.; Schlabach, M.R.; Billy, E.; Hoffman, G.R.; deWeck, A.; Ruddy, D.A.; Venkatesan, K.; Yu, J.; McAllister, G.; et al. Disordered Methionine Metabolism in MTAP/CDKN2A-Deleted Cancers Leads to Dependence on PRMT5. *Science* **2016**, *351*, 1208–1213, doi:10.1126/science.aad5944.
12. Duncan, K.W.; Rioux, N.; Boriack-Sjodin, P.A.; Munchhof, M.J.; Reiter, L.A.; Majer, C.R.; Jin, L.; Johnston, L.D.; Chan-Penebre, E.; Kuplast, K.G.; et al. Structure and

- Property Guided Design in the Identification of PRMT5 Tool Compound EPZ015666. *ACS Med. Chem. Lett.* **2016**, 7, 162–166, doi:10.1021/acsmedchemlett.5b00380.
13. Chan-Penebre, E.; Kuplast, K.G.; Majer, C.R.; Boriack-Sjodin, P.A.; Wigle, T.J.; Johnston, L.D.; Rioux, N.; Munchhof, M.J.; Jin, L.; Jacques, S.L.; et al. A Selective Inhibitor of PRMT5 with in Vivo and in Vitro Potency in MCL Models. *Nat. Chem. Biol.* **2015**, 11, 432–437, doi:10.1038/nchembio.1810.
  14. Antonyamy, S.; Bonday, Z.; Campbell, R.M.; Doyle, B.; Druzina, Z.; Gheyi, T.; Han, B.; Jungheim, L.N.; Qian, Y.; Rauch, C.; et al. Crystal Structure of the Human PRMT5:MEP50 Complex. *Proc. Natl. Acad. Sci. U. S. A.* **2012**, 109, 17960–17965, doi:10.1073/pnas.1209814109.
  15. Ho, M.-C.; Wilczek, C.; Bonanno, J.B.; Xing, L.; Seznec, J.; Matsui, T.; Carter, L.G.; Onikubo, T.; Kumar, P.R.; Chan, M.K.; et al. Structure of the Arginine Methyltransferase PRMT5-MEP50 Reveals a Mechanism for Substrate Specificity. *PLOS ONE* **2013**, 8, e57008, doi:10.1371/journal.pone.0057008.
  16. Sun, L.; Wang, M.; Lv, Z.; Yang, N.; Liu, Y.; Bao, S.; Gong, W.; Xu, R.-M. Structural Insights into Protein Arginine Symmetric Dimethylation by PRMT5. *Proc. Natl. Acad. Sci.* **2011**, 108, 20538–20543, doi:10.1073/pnas.1106946108.
